# Supplementary material
Source: Springer Nature journal article supplement (https://www.springermedizin.de/resource/supplementary/13063_2013_1938_MOESM4_ESM.pdf/9621954)

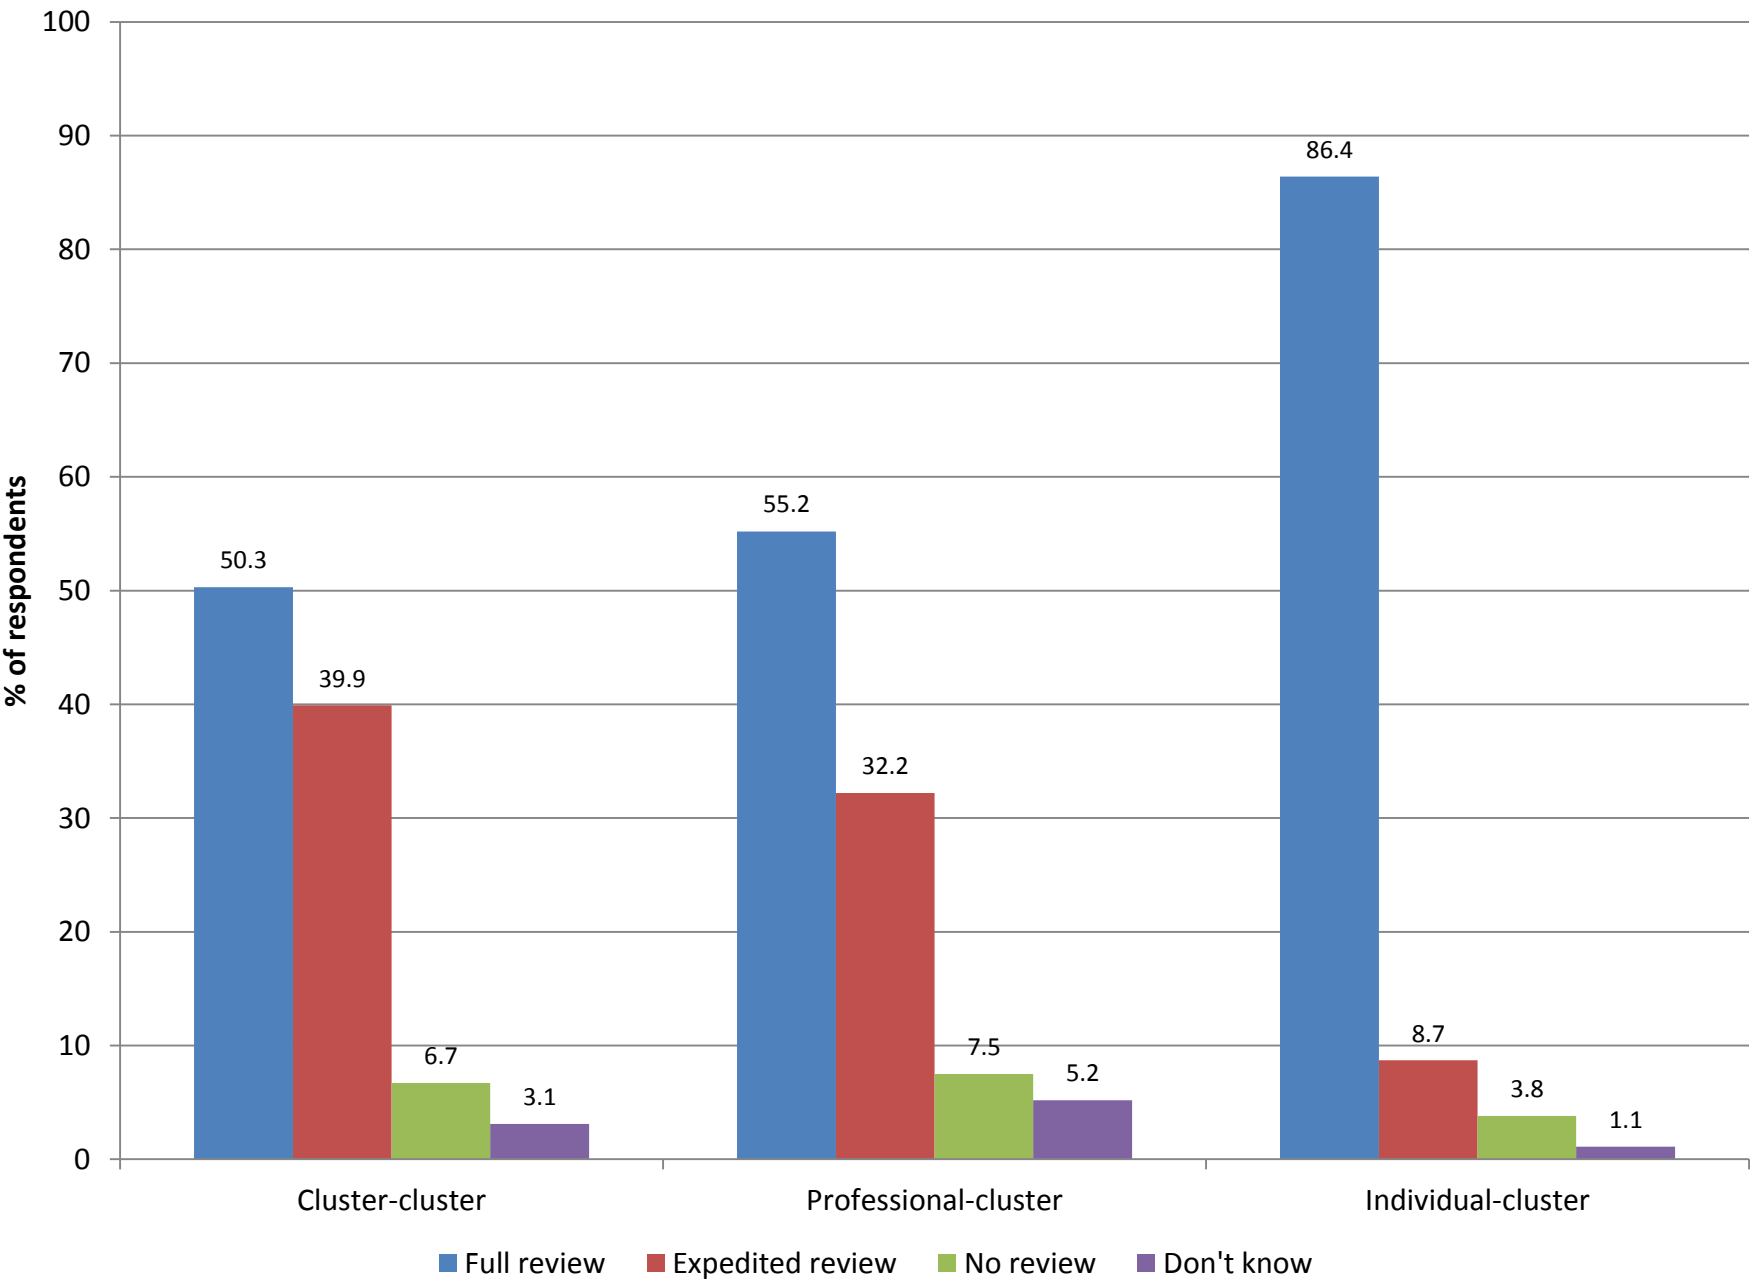

Supplement: MOESM4 [file 9621954]
